# Supplementary material for: Behavioral Time Scale Synaptic Plasticity (BTSP) endows Hyperdimensional Computing with brain-like information retrieval flexibility
Source: Research Square preprint supplement (doi:10.21203/rs.3.rs-6742959/v1), 2025-11-06
Supplement: Supplementary file 1 [file 706411b2f534be35bf594a40.pdf]

# Supplementary Information

## S1. Algorithmic Description of Implementation

---

### Algorithm 1 Combining binding in CA1 with association in CA3

---

**Input:** Forward synaptic weights,  $W_{feed,CA3}$  from input neurons to CA3 neurons,  $W_{feed,CA1}$  from CA3 neurons to CA1 neurons, initialized as  $W_{feed,CA3}^{(0)} = W_{feed,CA1}^{(0)} = 0$ . Lateral synaptic weights,  $W_h$  recurrent from CA3 to CA3, initialized as  $W_h^{(0)} = 0$ . Backward synaptic weights,  $W_{back}$ , from memory neurons back to input neurons, initialized as  $W_{back}^{(0)} = 0$ . Plateau potential probability  $f_q$ . Connection probability  $f_w$ . Number of sentences  $N$ . Training data consists of words sets for each sample  $\{A_i, B_i, C_i, D_i, E_i, F_i, G_i, H_i\}_{i \leq N}$ .

**Objective:** Training  $W_{feed,CA3}$ ,  $W_h$ ,  $W_{feed,CA1}$ ,  $W_{back}$  during the binding process.

```

1: ## Binding ##
2: for each batch sample in  $\{A_i, B_i, C_i, D_i, E_i, F_i, G_i, H_i\}_{i \leq N}$  do
3:   ## BTSP learning from input to CA3 ##
4:   Update  $W_{feed,CA3}$  based on current inputs on the input layer through BTSP learning.
5:   Get the composed representation on CA3 through  $W_{feed,CA3}$ .
6:   ## BTSP learning from CA3 to CA1 ##
7:   Update  $W_{feed,CA1}$  based on the composed representation on CA3 through BTSP learning.
8:   Get the composed representation on CA1 through  $W_{feed,CA1}$ .
9:   ## Hebb learning from CA1 to input ##
10:  Update  $W_{back}$  based on the composed representation on CA1 and inputs.
11:  ## one-shot BTSP-like plasticity rule for lateral connections in CA3 ##
12:  Update  $W_h$  based on the activation of pre- and postsynaptic neurons on CA3.
13: end for
14: ## Bottom-up unbinding ##
15: for each single cue  $\{B_i\}_{i \leq N}$  do
16:   Initialize  $S(B, 2)_0 = 0$ .
17:   Denote the current masked input as  $I(B, 2)$ .
18:   for each iteration  $t = 1$  to 200 do
19:     Get the state on CA3 via  $S(B, 2)_t = kWTA^*(W_h \times S(B, 2)_{t-1} + W_{feed,CA3} \times I(B, 2))$ 
20:     (the notation  $kWTA^*(\cdot)$  represents a restriction where, before k-WTA,
21:     neurons that continue to spike for 10 consecutive time slots are masked for next 50 slots).
22:     Get the state on CA1 via  $R(B, 2)_t = thr(W_{feed,CA1} \times S(B, 2)_t)$ 
23:     (the notation  $thr(\cdot)$  represents where activations exceed the threshold output 1, o/w 0.)
24:     Get the recovered words via  $thr(W_{back} \times R(B, 2)_t)$ 
25:   end for
26: end for

```

---

**Algorithm 1: Combining binding in CA1 with association in CA3.** We introduce CA3 as an intermediate layer to temporally decouple the superposition, allowing the network to sequentially oscillate among all valid patterns. Dense lateral connections and global k-Winners-Take-All (k-WTA) operations within CA3 enable attractors to form before propagating activation to the memory layer. During the binding phase, activity can pass through the CA3 layer without engaging the internal dynamics produced by its recurrent lateral connections. We apply one-shot synaptic plasticity to the weights  $W_h$  only once (Line 6), targeting the representation generated at the first step. We select the composed representations of CA3 (Line 4) and CA1 (Line 9) during the binding process as the states for subsequent comparisons between  $S(B, 2)_t$  and  $R(B, 2)_t$ . The representation generated on Line 4, referred to in the caption of Fig. 4E, is recognized as the first state of the recurrent network module when a full sentence is presented on the input layer. The representation generated on Line 9 corresponds to the first state of the memory neurons when a full sentence is presented on the input layer. To ensure stability in the recurrent process, we employ k-Winners-Take-All (k-WTA), selecting the k neurons with the highest activation levels to fire spikes while the rest remain inactive, to control the number of spikes in CA3 (Line 17), where each activation consistently engages 60 neurons (k=60 for WTA).

---

**Algorithm 2** Hierarchical iterated binding with eight words

---

**Input:** Forward synaptic weights,  $W_{feed}$ , from input neurons to memory neurons, initialized as  $W_{feed}^{(0)} = 0$ . Backward synaptic weights,  $W_{back}$ , from memory neurons back to input neurons, initialized as  $W_{back}^{(0)} = 0$ . Plateau potential probability  $f_q$ . Connection probability  $f_w$ . Number of sentences  $N$ . Training data consists of words sets for each sample  $\{A_i, B_i, C_i, D_i, E_i, F_i, G_i, H_i\}_{i \leq N}$ .

**Objective:** Training  $W_{feed}$ ,  $W_{back}$  during the binding process.

```
1: Create a queue  $Q$  for temporarily storing intermediate inputs
2: Assign  $Q = \{A, B, C, D, E, F, G, H\}$ 
3: ## Binding ##
4: for each level  $l = 1$  to 3 do
5:   for each pair do
6:     Get two inputs from the queue  $Q$ .
7:     Update  $W_{feed}$  based on current inputs through BTSP learning.
8:     e.g. current inputs  $C$  and  $D$ .
9:     Get anticipated composed representations based on current  $W_{feed}$ .
10:    e.g. from inputs  $C$  and  $D$  to  $CR < C, D >$ .
11:    Update  $W_{back}$  based on the current composed representation and inputs.
12:    e.g.  $W_{back}$  for  $CR < C, D >$  back to inputs  $C$  and  $D$ .
13:    Add the new composed representation to the queue  $Q$ .
14:   end for
15: end for
16: Assign the queue with the final composed representation,  $Q = \{< A, B, C, D, E, F, G, H >\}$ 
17: ## Top-down unbinding ##
18: for each level  $l = 3$  to 1 do
19:   for each step do
20:     Get the current composed representation from the queue  $Q$  that needs to be decoded.
21:     Use the current  $CR$  and  $W_{back}$  to recover the two decoupled inputs.
22:     e.g. composed representations  $< C, D >'$  and recovered inputs  $C'$  and  $D'$ .
23:     Add the new recovered vectors to the queue  $Q$ .
24:   end for
25: end for
```

---

**Algorithm 2: Hierarchical iterated binding in the eight-words case.** Global weights  $W_{feed}$  and  $W_{back}$  are utilized throughout the entire binding process. For learning  $W_{feed}$  based on BTSP, the training protocol initiates at the first level with binding  $\{A, B\}$  into  $< A, B >$ , followed by binding  $\{C, D\}$  into  $< C, D >$  at the second step, and so forth. At the second level, the first step involves binding  $< A, B >$  and  $< C, D >$  into  $<< A, B >, < C, D >>$ . This process continues in the same manner until the final level, resulting in  $<<< A, B >, < C, D >>, << E, F >, < G, H >>>$ . The learning of  $W_{back}$  follows sequentially through the binding steps, mirroring the  $W_{feed}$  training. The training concludes at the final level, after which the network's weights are finalized. At this point, the top-down unbinding process employs the network's  $W_{back}$  to calculate the reversal from the final composed representation back to all intermediate composed representations and the input words.

## S2. Control experiments on sparsity

Control experiments with different densities of input vectors  
and different probabilities of plateau potentials

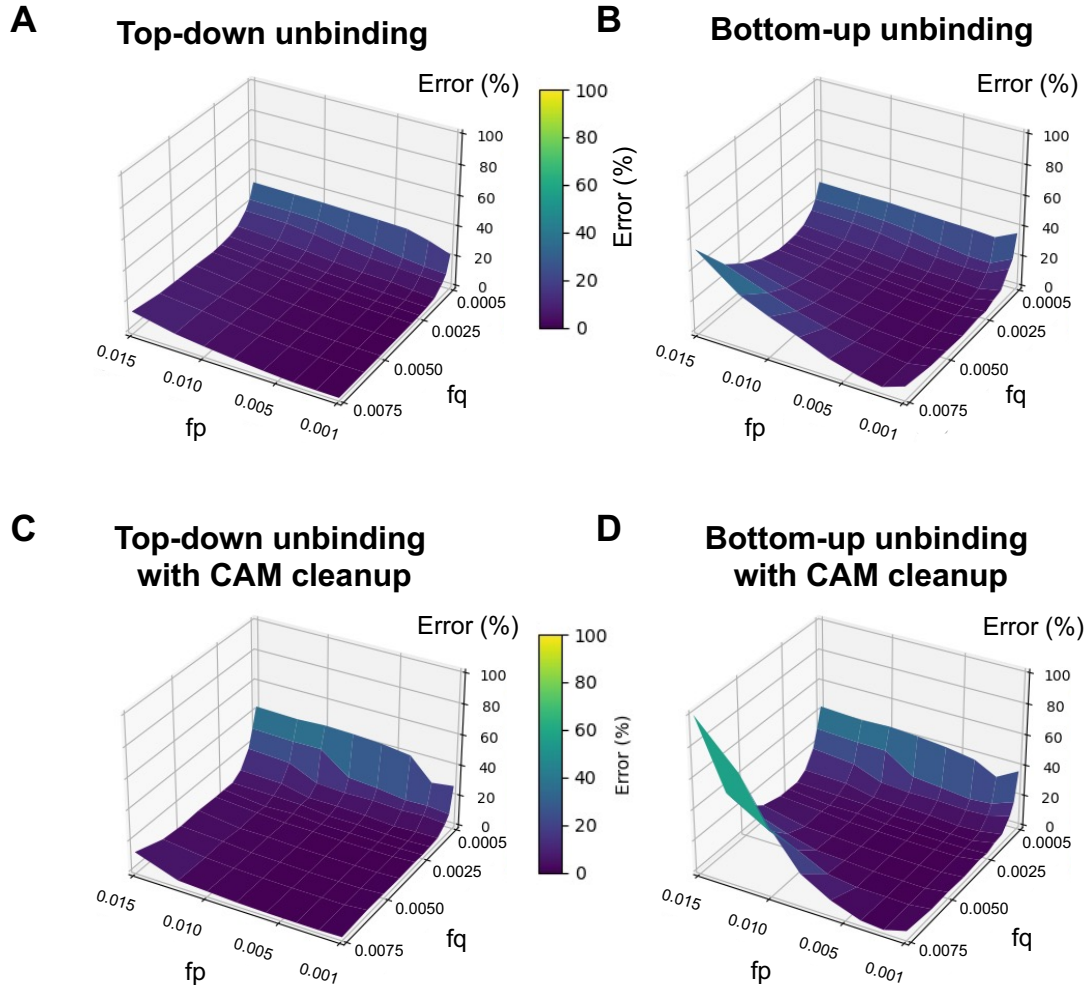

**Fig. S1:** Control experiments on sparsity.
